# Supplementary material for: Expression of aquaporin1, a water channel protein, in cytoplasm is negatively correlated with prognosis of breast cancer patients
Source: PubMed Central journal article supplement (PMC4884982; doi:10.18632/oncotarget.6994), 2016-01-23
Supplement: oncotarget-07-8143-s001.pdf [file oncotarget-07-8143-s001.pdf]

## Expression of aquaporin1, a water channel protein, in cytoplasm is negatively correlated with prognosis of breast cancer patients

### Supplementary Materials

**Supplementary Table S1: Information of patients in figure 2H**

| Number* | Age (years) | Histological grade | ER (%) | PR (%) | Her2 |
|---------|-------------|--------------------|--------|--------|------|
| 1       | 73          | I                  | 90     | 40     | +    |
| 2       | 43          | I                  | 75     | 80     | +    |
| 3       | 44          | I                  | 90     | 90     | -    |
| 4       | 55          | I                  | 90     | 70     | +    |
| 5       | 50          | I                  | 90     | 90     | -    |
| 6       | 63          | I                  | 85     | 8      | +    |
| 7       | 67          | I                  | 90     | 65     | +    |
| 8       | 71          | II                 | 90     | 70     | +    |
| 9       | 32          | II                 | 90     | 80     | ++   |
| 10      | 51          | II                 | < 1    | < 1    | -    |
| 11      | 64          | II                 | 90     | 90     | ++   |
| 12      | 52          | II                 | 80     | 50     | +    |
| 13      | 61          | II                 | 90     | < 1    | ++   |
| 14      | 59          | II                 | 90     | 85     | ++   |
| 15      | 47          | II                 | 50     | 60     | ++   |
| 16      | 64          | II                 | < 1    | < 1    | ++   |
| 17      | 63          | III                | < 1    | < 1    | ++   |
| 18      | 50          | III                | < 1    | < 1    | ++   |
| 19      | 46          | III                | < 1    | < 1    | +++  |
| 20      | 58          | III                | < 1    | < 1    | -    |
| 21      | 75          | III                | 90     | 20     | ++   |
| 22      | 47          | III                | 60     | 60     | +    |
| 23      | 39          | III                | < 1    | < 1    | +++  |

\*The order of specimens was same as Western blot analysis of Figure 2H.

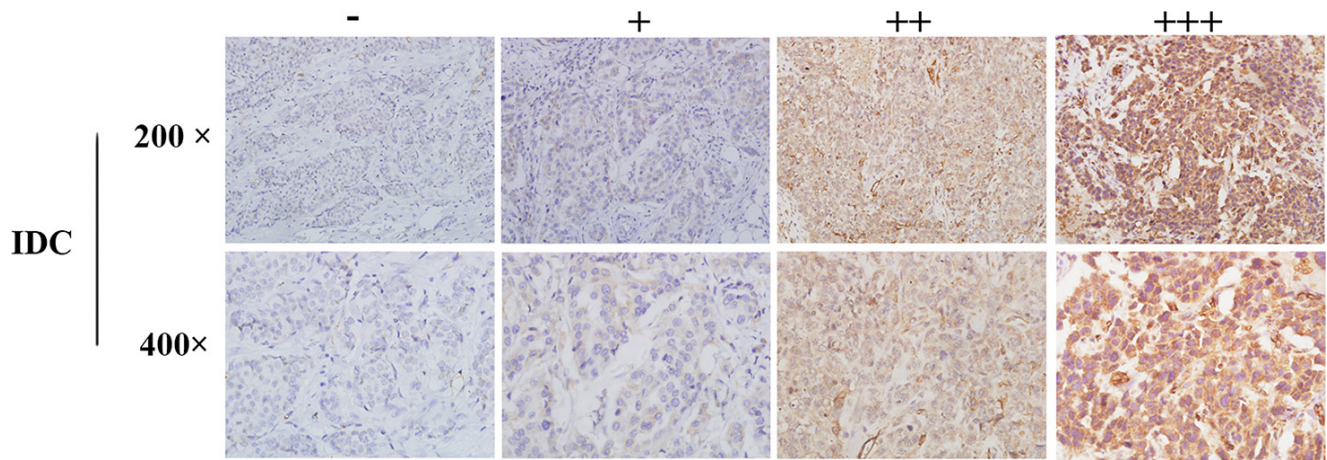

**Supplementary Figure S1: Varying staining intensity of AQP1 protein in IDC breast tissues: (-) no staining; (+) definite but weak staining; (++) moderate staining and (+++) strong staining.** The lower part (magnification 400 ×) is the amplification of the upper part (magnification 200 ×).

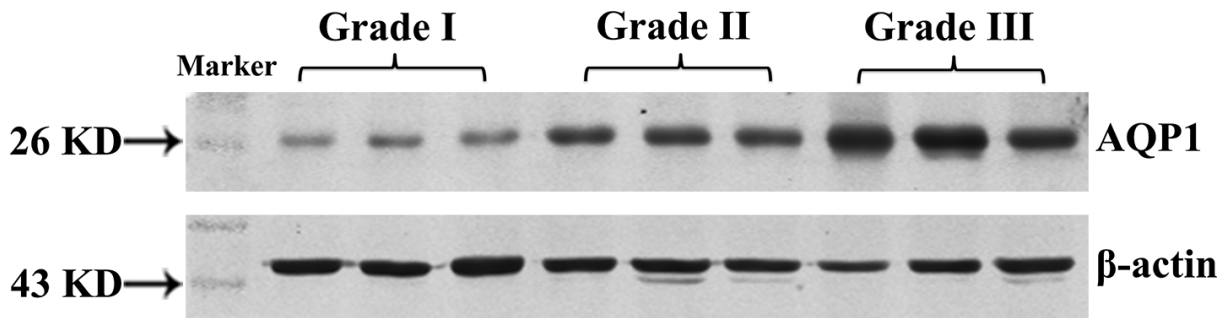

**Supplementary Figure S2: Western blot result of AQP1 protein expression in IDC specimens with different pathological grades in one gel.** All the patients were female (Grade I: 3 cases; Grade II: 3 cases; Grade III: 3 cases).  $\beta$ -actin was used as a loading control.

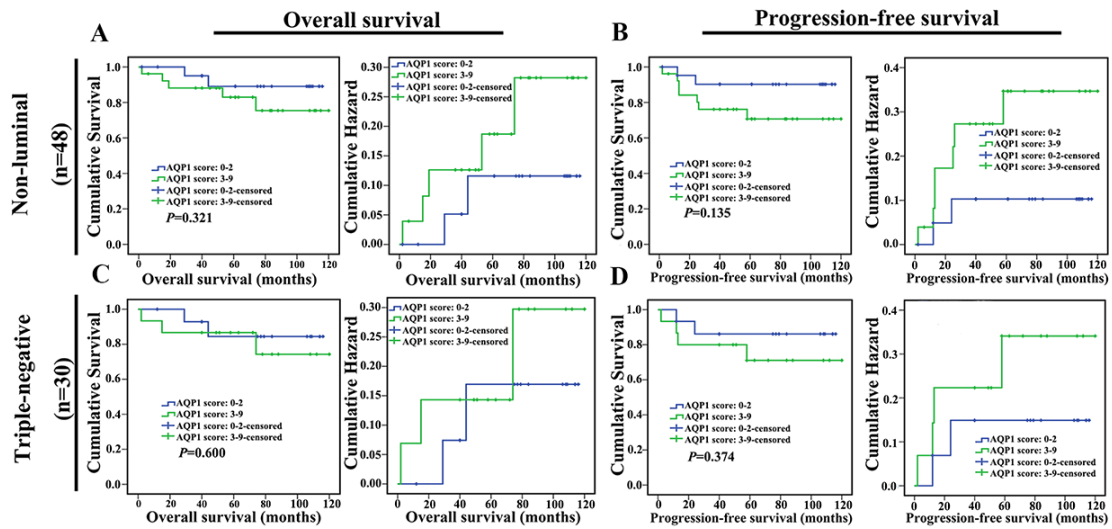

**Supplementary Figure S3: Cytoplasmic expression of AQP1 was not associated with prognosis of non-luminal patients or triple-negative patients.** (A) There was no difference between OS of non-luminal patients with high AQP1 expression and that of patients with low AQP1 expression ( $P = 0.321$ ). (B) There was no difference between PFS of non-luminal patients with high AQP1 expression and that of patients with low AQP1 expression ( $P = 0.135$ ). (C) There was no difference between OS of triple-negative patients with high AQP1 expression and that of patients with low AQP1 expression ( $P = 0.600$ ). (D) There was no difference between PFS of triple-negative patients with high AQP1 expression and that of patients with low AQP1 expression ( $P = 0.374$ ).

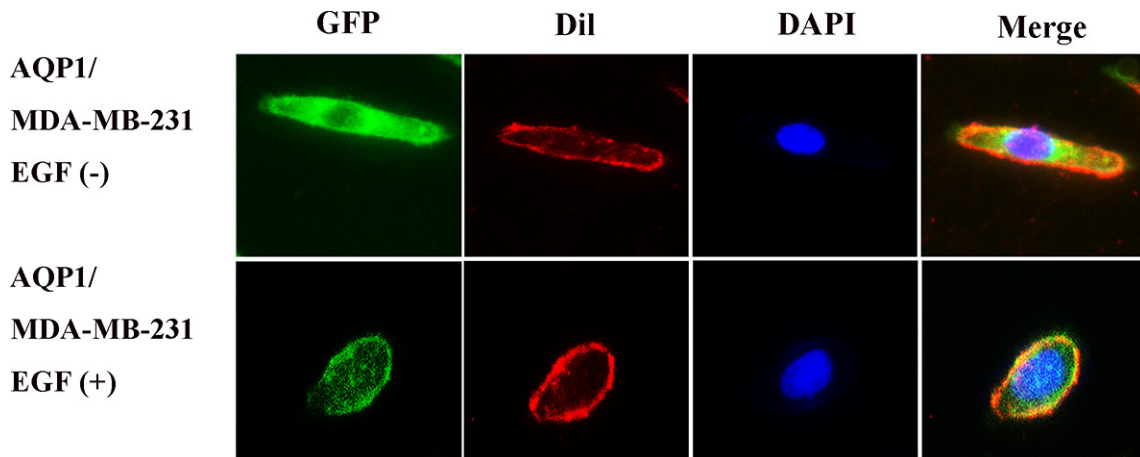

**Supplementary Figure S4: EGF (epidermal growth factor) stimulation-induced AQP1 subcellular translocation in GFP labeled fusion protein AQP1-overexpressing MDA-MB-231 cells.** AQP1 translocation from cytoplasm to membrane was triggered by EGF treatment (10 ng/ml, 20 min). Nuclei were stained with DAPI (blue color). Cell membrane was stained with Dil (red color) (1, 1-dioctadecyl-3, 3,3, 3-tetramethylindocarbocyanine perchlorate). (Magnification 200  $\times$ ).
